# 1 Computational Strategies in Nutrigenetics: 2 Constructing a Reference Dataset of Nutrition- 3 Associated Genetic Polymorphisms

4 Giovanni Maria De Filippis<sup>a</sup> (0009-0002-8395-0724), Maria Monticelli<sup>a,b</sup> (0000-0003-3136-2138), Alessandra  
5 Pollice<sup>a</sup> (0000-0003-1619-5925), Tiziana Angrisano<sup>a</sup> (0000-0002-5940-5278), Bruno Hay Mele<sup>a\*</sup> (0000-0001-  
6 5579-183X \*), Viola Calabro<sup>`a</sup> (0000-0002-6508-8889)

7 <sup>a</sup> Department of Biology, University of Napoli "Federico II", Complesso Universitario Monte Sant'Angelo, Via Cinthia,  
8 80126 Napoli, Italy

9 <sup>b</sup> Institute of Biomolecular Chemistry (ICB), National Research Council (CNR), Via Campi Flegrei 34, 80078 Pozzuoli,  
10 Italy

11

## 12 Abstract

13 **Objective:** This study aimed to build a comprehensive dataset of human genetic polymorphisms associated  
14 with nutrition by integrating data from multiple sources, including the LitVar database, PubMed, and the  
15 GWAS catalog. Such a resource could facilitate the exploration of genetic polymorphisms associated with  
16 nutrition-related traits.

17 **Methods:** We developed a Python pipeline to streamline the integration and analysis of genetic  
18 polymorphism data associated with nutrition. We employed the MeSH ontology as a framework to aggregate  
19 relevant genetic data. The pipeline comprises five distinct modules that go through the following steps: data  
20 extraction from LitVar and PubMed articles, generation of a joint dataset by data merging, generation of  
21 comprehensive MeSH term lists, filtering of the joint dataset using the selected MeSH sets, lexical analysis  
22 and augmentation of the dataset with data from of the GWAS catalog dataset.

23 **Results:** We successfully aggregated a wide range of papers and data on genetic polymorphism and nutrition-  
24 related traits into a single dataset. Cross-referencing with the GWAS catalog dataset provided information  
25 about possible effects or risk alleles associated with the identified genetic polymorphisms. The nutrigenetic  
26 dataset we developed is a tool for nutritionists and researchers, serving as a preliminary benchmark for  
27 personalized nutrition interventions based on genetic testing.

28 **Conclusion:** The pipeline presented here consolidates and organizes information on genetic polymorphisms  
29 associated with nutrition, enabling comprehensive analysis and exploration of gene-diet interactions.

NOTE: This preprint reports new research that has not been certified by peer review and should not be used to guide clinical practice.

30 Overall, the method contributes to advancing personalized nutrition interventions and nutrigenomics  
31 research. The flexible nature of the system allows its application to other investigations related to genetic  
32 polymorphisms.

33 **Keywords:** Nutrigenetics, Genetic polymorphisms, Personalized nutrition, Gene-diet interactions, Data  
34 integration, MeSH ontology

## Graphical Abstract

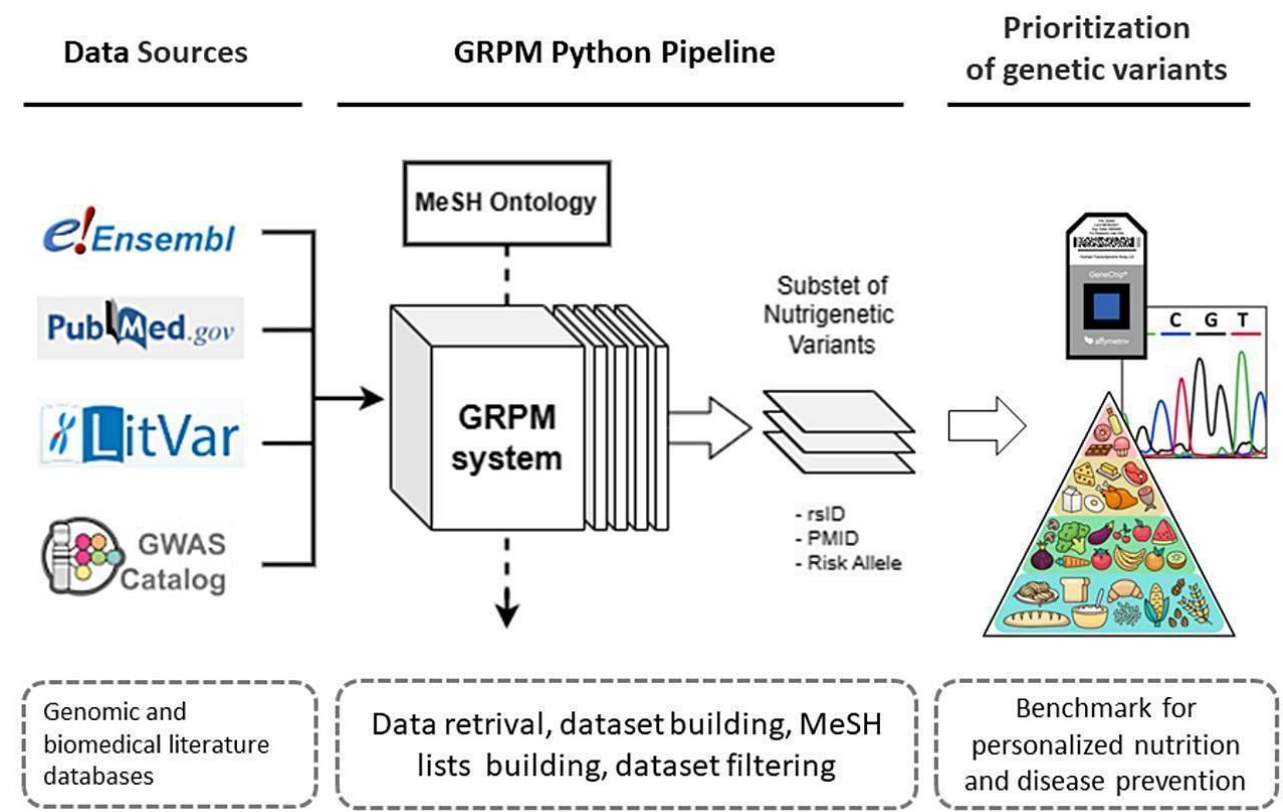

## 35 1. Introduction

36 Nutrition is critical to health and disease (1). Emerging evidence suggests that genetic polymorphisms  
37 significantly impact an individual's response to different nutrients and dietary patterns by affecting nutrient  
38 bioavailability and metabolism (2). Moreover, it has been demonstrated that common gene variations are  
39 linked to complex chronic health issues significantly affected by nutritional factors (3). Advancements in  
40 genomics technologies and the subsequent availability of large-scale genetic data have fueled interest in  
41 identifying and categorizing genetic polymorphisms associated with nutrition-related traits (4). The field of  
42 nutrigenetics was thus born to comprehend how genetic variations influence an individual's nutritional  
43 requirements, metabolism, and health outcomes (5). By considering an individual's genetic profile,  
44 healthcare professionals and nutritionists can provide tailored dietary advice and interventions that optimize  
45 nutrient bioavailability and promote better health outcomes in that individual (6). Nutrigenetic associations  
46 imply that specific genetic polymorphisms can induce susceptibility to chronic diseases. The response to  
47 specific nutrients or dietary patterns may be crucial in determining health outcomes (6).

48 Recent literature contains extensive data on nutrition-associated genetic polymorphisms (2,7). However,  
49 these data are often scattered, diverse in format, and lack a standardized curation process. Such  
50 complications hinder data integration, limit information extraction and synthesis, and pose a barrier to data  
51 utilization in decision support systems (8). Integrating available data and overcoming the limits of self-  
52 reported methods in research is crucial for accurate omics data integration, nutrigenetics, and nutrigenomics  
53 research, especially in clinical settings (8). Therefore, there is a need to develop curated and consolidated  
54 resources that integrate nutrition-associated genetic polymorphism data, along with omics data, to advance  
55 personalized nutrition interventions and clinical decision-making.

56 Here, we built a structured dataset of human genetic polymorphisms associated with nutrition by integrating  
57 data from different established sources: the LitVar database (9), which contains curated information on  
58 genetic variations and their functional effects; the Pubmed-Medline database, which provides structured  
59 MeSH ontology annotations; and the GWAS catalog dataset, which reports human variant-traits associations.  
60 Our dataset includes data from Medline studies associated with nutrition-related genetic polymorphism.  
61 Specific sets of MeSH terms related to nutrition physiology, nutrition-related diseases, prevention through  
62 diet, and eating behavior were used to extract subsets of genes and their single-nucleotide polymorphisms  
63 (SNPs) potentially associated with nutrition-related traits. Cross-referencing with the GWAS catalog dataset  
64 (10) provided information about effect/risk alleles associated with the collected studies. The database was  
65 curated to ensure data quality, consistency, and relevance to nutrition and nutrigenomics research, thus  
66 providing a valuable resource to investigate the intricate interplay between genetics and nutrition.

67

## 68 2. Methods

### 69 2.1 General Presentation

70 This study uses Medical Subject Headings (MeSH) to connect genetic polymorphism data from various  
71 resources. *MeSH ontology* (11) is a standardized and controlled vocabulary that offers descriptors utilized in  
72 biomedicine and informatics to classify and categorize biomedical literature and data. The standardized and  
73 controlled nature of MeSH terms makes them highly adaptable for broader utilization in analyzing scientific  
74 indicators. MeSH terms associated with a document can be thought of as references to a collection of  
75 knowledge stored as documents in a database (12).

76 To build a structured dataset that aligns genomic data and scientific papers, we connected the LitVar and  
77 PubMed databases through shared MeSH terms. The LitVar database is a comprehensive and publicly  
78 accessible resource that collects information on genetic variations and their associated scientific literature.  
79 It aims to bridge the gap between genomic data and the relevant literature by aggregating and organizing  
80 information on genetic variants from a wide range of sources (9). PubMed serves as the principal repository  
81 of biomedical literature. Extracting data from PubMed is crucial for various research purposes, such as  
82 literature reviews, data mining, and knowledge discovery (13).

83 We developed a Python pipeline that leverages the MeSH ontology as a crucial framework to aggregate  
84 genetic polymorphism data for a topic of interest effectively. We named the tool "GRPM system" (Gene-RsID-  
85 PMID-MeSH) and specifically designed it to streamline the integration and analysis of genetic polymorphism  
86 data associated with a given biomedical field, such as nutrition. With the increasing importance of genetic  
87 factors in understanding nutrition-related traits, the GRPM system could help researchers and nutritionists  
88 explore and analyze such data efficiently.

89 The system is written in Python, exploits the Jupyter Notebook format (14), and comprises five modules  
90 designed for specific purposes (Figure 1). These modules support the following operations:

- 91 1. Data Retrieval and Merging: facilitates data extraction, integration, and consolidation from source  
92 databases, including LitVar and PubMed, ensuring a comprehensive collection of genetic  
93 polymorphisms associated with topic-related traits (GRPM dataset).
- 94 2. MeSH Term List Creation: generates coherent MeSH term lists and links them to the collection,  
95 enabling efficient exploration of the GRPM dataset. This enrichment empowers users to access  
96 specific genetic information relevant to the chosen topic easily.
- 97 3. Dataset Filtering with Selected MeSH Terms: enables the user to screen collected data using selected  
98 MeSH terms. This way, users can refine their search and focus on specific areas of interest within the  
99 GRPM dataset.

- 100 4. Statistical Analysis: assigns each gene a relative measure of interest based on the number and  
101 proportion of associated findings gathered in the GRPM dataset. This calculation enables the  
102 prioritization of genes related to a chosen topic, aiding further investigation or personalized nutrition  
103 interventions.
- 104 5. GWAS Dataset Incorporation: integrates the GWAS catalog dataset into the collection, providing  
105 insights into effect/risk alleles associated with identified genetic polymorphisms. This process  
106 enriches our nutrigenetic resource with supplemental data for further analysis.

107 More detailed information about the GRPM system, including implementation details and usage instructions,  
108 is available on GitHub<sup>1</sup>.

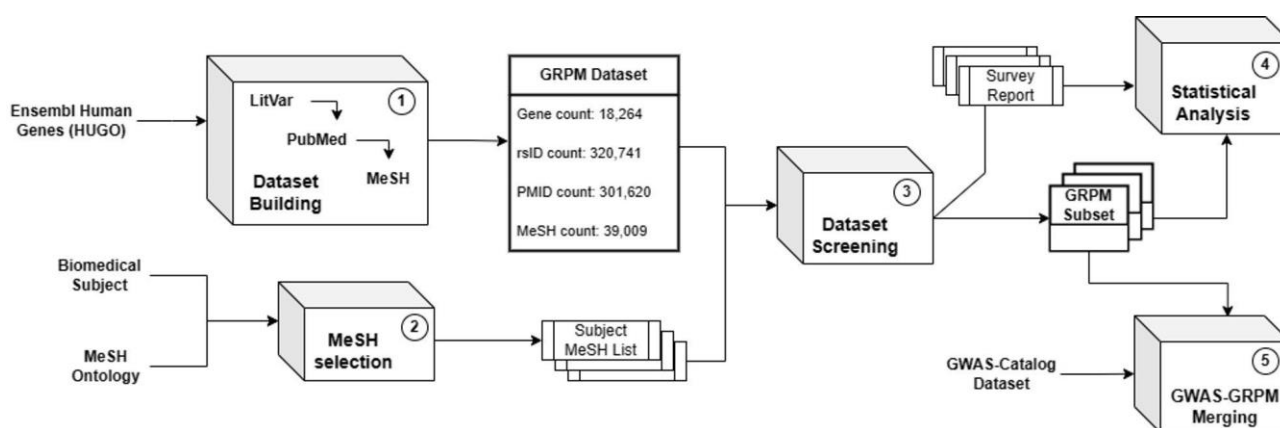

109 **Figure 1:** A graphical overview of the GRPM system workflow showcasing the input data and interactions between the  
110 five modules. A brief quantitative description of the GRPM Dataset is also shown.

111

## 112 2.2 GRPM Dataset Building

113 The first module uses the LitVar Application Programming Interface (API)<sup>2</sup> to retrieve all polymorphisms for  
114 each human gene<sup>3</sup> within the LitVar database alongside all associated PubMed Identifiers (PMIDs). These  
115 PMIDs were subsequently employed as queries on PubMed to obtain MEDLINE data. We utilized the NBIB  
116 parser<sup>4</sup>, a Python package designed explicitly for parsing MEDLINE-PubMed data, to streamline the data  
117 collection. The collected data were ultimately consolidated into a single CSV file (from now on called “GRPM  
118 ds”), serving as the primary source against which MeSH term queries can be launched to retrieve genes and  
119 polymorphisms associated with specific contexts.

<sup>1</sup> GRPM\_system (github.com): [https://github.com/johndef64/GRPM\\_system](https://github.com/johndef64/GRPM_system)

<sup>2</sup> LitVar API Docs: <https://www.ncbi.nlm.nih.gov/CBBresearch/Lu/Demo/LitVar/api.html>

<sup>3</sup> The HGCN names lists of human protein-coding genes, RNA genes, and pseudogenes were retrieved from the Ensembl database through the BioMart application.

<sup>4</sup> nbib · PyPI: <https://pypi.org/project/nbib/>

## 120 **2.3 Dataset filtering and screening**

121 The GRPM system is designed to retrieve subsets of genes and polymorphisms from GRPM ds, employing a  
122 user-defined list of MeSH terms as a hook. Careful selection of the MeSHs is crucial at this stage: the list must  
123 represent the chosen search field out of the total complex of terms in GRPM ds. For this purpose, we referred  
124 to the subset of 21.705 MeSH terms related to LitVar publications retrieved instead of the complete MeSH  
125 ontology (348.733 terms)<sup>5</sup>. This subset collects MeSH terms linked to papers exploring the associations  
126 between genetic variants and biomedical traits.

127 The second module is built to subset this extensive MeSH collection with representatives of a particular  
128 biomedical field. We utilized the natural language processing capabilities of Generative Pre-trained  
129 Transformer (GPT) provided by OpenAI<sup>6</sup> through its API. The procedure involved generating simple lists of  
130 words through one or more biologically relevant prompts (see Supplementary Materials). These lists are used  
131 to extract the real MeSH terms related to the subject from our dataset (70-400 MeSHs extracted for each  
132 query). Subsequently, the extracted MeSH terms were manually screened to eliminate ambiguous and bias-  
133 generating terms. This filtering process ensures that only appropriate and meaningful terms are utilized for  
134 the subsequent full dataset screening.

135 The screening of the entire dataset using the selected MeSH set (our *query*) is obtained by running our third  
136 Jupyter module. It takes approximately three to four hours on an average workstation using MeSH lists  
137 ranging in size from 100 to 400 terms. When the procedure ends, the system generates a comprehensive  
138 report and a curated "Survey Dataset" that captures the essential association data. The reports generated  
139 from various surveys are subjected to individual analysis and comparative examination in the fourth module.

## 140 **2.4 Gene Interest Index (GI)**

141 We consider a gene "interesting" if its related SNPs are associated with a substantial number of PMIDs (*i.e.*,  
142 scientific papers) that include relevant MeSH terms and if the ratio between these relevant papers and the  
143 total number of papers associated with the gene is sufficiently high.

144 To assess the relevance of the gene set retrieved for the chosen topic, it is crucial to consider the MeSH set  
145 employed as a single entity rather than independently, given the difference in the relative importance of  
146 terms. To define a gene as "interesting" based on its associated MeSH terms from related LitVar studies, we  
147 propose scaling the number of detected PMIDs (PubMed IDs) by all the PMIDs associated with that gene in

---

<sup>5</sup> The complete Medical Subject Headings dataset can be downloaded at <https://www.nlm.nih.gov/mesh/meshhome.html>

<sup>6</sup> OpenAI. (2023). ChatGPT (Mar 14 version) [Large language model]. <https://chat.openai.com/chat>

148 LitVar. This approach helps minimize selection bias caused by extensively studied genes associated with more  
149 MeSH terms than others — these terms could not be directly correlated with the query topic.

150 Given the set of genes  $L(i)$  retrieved with the query ( $j$ ), we introduce the following indices:

- 151 1.  $Pg_i$ : The total number of PMIDs associated with gene  $i$ ;
- 152 2.  $Pm_{i,j}$ : The number of  $i$ -related PMIDs containing at least one MeSH from the query  $j$ ;
- 153 3.  $Pm_{\max}$ : The highest  $Pm_{i,j}$  value across all the genes in  $L$ ;
- 154 4.  $Pm\ score_{i,j}$ : the  $Pm_{i,j}$  value normalized  $Pm_{\max}$ ;
- 155 5.  $Pm\ ratio_{i,j}$ : the ratio of  $Pm$  to  $Pg$ . It measures the proportion of matching PMIDs to the total PMIDs  
156 associated with the gene.

157 Based on these indices, we introduce the “Gene Interest Value” (GV), calculated as the product of “Pm score”  
158 and “Pm ratio” and its normalized form, the “Gene Interest Index” (GI), which is adjusted relative to the  
159 maximum value obtained in the survey. The ratio serves as a modifier in determining the level of interest for  
160 each gene.

$$161 \quad GV_{ij} = Pm\ index \cdot Pm\ ratio = \frac{Pm_{ij}}{Pm_{\max}} \cdot \frac{Pm_{ij}}{Pg_i} \quad (1.1)$$

$$162 \quad GI = \frac{GV}{GV_{\max}} \quad (1.2)$$

163 By integrating the  $Pm$  score and  $Pm$  ratio, the GI method acts as a coherent measure of gene relevance.  
164 Figure 2 visually represents an example of gene prioritization obtained through the Index using the “Obesity  
165 and Weight Control” MeSH list as a reference. Panel (a) shows the  $Pm$  ratio (green) and  $Pm$  score (yellow). It  
166 highlights the importance of considering both indexes, which produce different orders. In Panel (b), the gene  
167 relevance-based sorting achieved with the GI is presented, and it is possible to appreciate the highest  
168 prioritization performance versus the other two. The integrated assessment provided by the GI method  
169 allows for more accurate gene prioritization, leading to a deeper understanding of gene-gene interactions  
170 and potential therapeutic targets in obesity and weight control management. Another example of gene  
171 prioritization through GI is presented in Supplementary Materials (Figure S1).

172

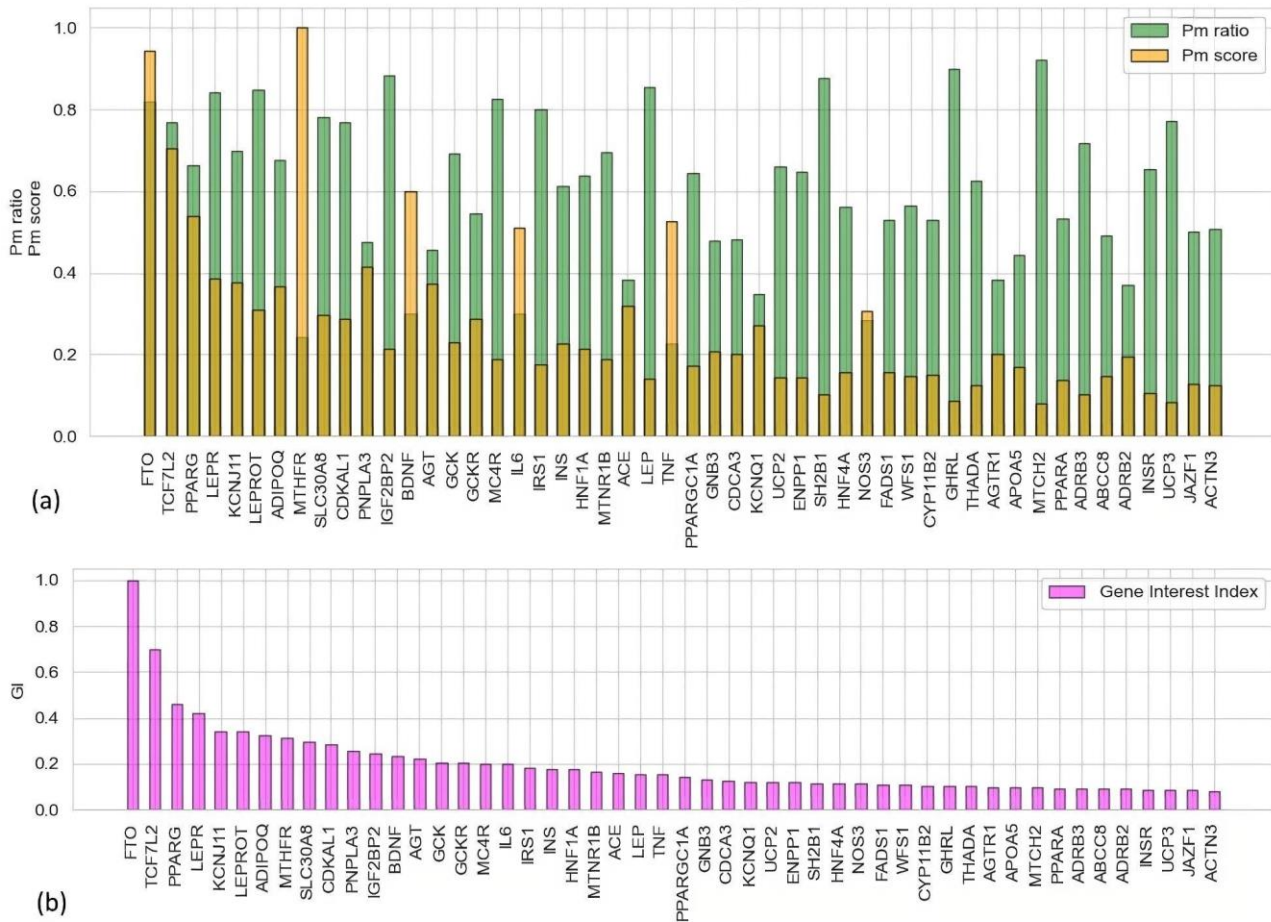

173 **Figure 2:** Visual representation of Gene Interest Index (GI) calculation through *Pm* score and *Pm* ratio, using as reference  
 174 the results from "Obesity and Weight Control" MeSH query (see results section). Panel (a) shows the matching PMID  
 175 ratio and overall matching PMID score. Panel (b) displays the gene relevance sort achieved with the GI.

## 176 2.5 GWAS Catalog data integration

177 While examining every paper to unravel the associated effect allele for each SNP ID (rsID) can be time-  
 178 consuming, an initial indication of the potential effect allele is valuable for conducting preliminary studies.  
 179 To address this issue, we leveraged Ensembl GWAS Catalog<sup>7</sup> data (10).

180 To integrate the GWAS data with the GRPM dataset, we followed a specific workflow (fifth module). First, we  
 181 retrieved the GRPM Survey data. Then, we applied a Gene Interest (GI) cut-off of 0.0125 to the GRPM Survey  
 182 data to prioritize the relevant genes. Most protein-coding genes have cited works with at least one of the  
 183 MeSHs of the lists used, but this does not imply that it is relevant to consider them all. By setting a GI  
 184 threshold value, we aimed to prioritize the genes that most fit with our tailored MeSH terms, allowing us to  
 185 focus on genes and their SNPs that demonstrated a higher degree of interest and relevance in the field of  
 186 nutrigenetic dietary advice. This approach helped remove noise or irrelevant results from the search process,

<sup>7</sup> GWAS Catalog (ebi.ac.uk): <https://www.ebi.ac.uk/gwas/docs/file-downloads>



187 allowing us to focus on genes more likely to provide valuable insights into gene-diet interactions and  
188 personalized nutrition interventions. At this point, the filtered GRPM Survey and GWAS dataset were merged  
189 based on the rsIDs. The merge was efficiently aligned with the GRPM MeSH terms through a correspondence  
190 dictionary. We subsequently utilized the Natural Language Toolkit (NLTK)<sup>8</sup> to tokenize the MeSH terms (and  
191 all their possible synonyms) and GWAS-mapped traits to perform the alignment. Finally, we retrieved the  
192 strongest SNP-risk allele for each rsID using the correspondence dictionary. This information serves as an  
193 initial indication and can be beneficial for conducting further studies, whether in a clinical or in-silico setting,  
194 based on the identified associations.

## 195 **3. Results**

### 196 **3.1 GRPM Dataset Statistics**

197 When utilizing the dataset, it is essential to account for each gene's relative richness in PMID. The genes that  
198 garnered the most attention in research are associated with a higher number of PMIDs, resulting in more  
199 MeSH annotations. Hence, to ensure data normalization, it is imperative to obtain a comprehensive  
200 understanding of the most represented genes within the dataset.

201 We divided the GRPM dataset<sup>9</sup> into three distinct partitions based on the gene type included: Protein Coding  
202 Genes, RNA Genes, and Pseudogenes. Since some genes are absent in LitVar, the dataset covers 80% of  
203 human protein-coding genes. Figure 3 (a) shows the statistics for each partition, including the number of  
204 genes, rsID (reference SNP ID number) entries, PMID entries, and MeSH terms associated with each gene  
205 type. These genes were considered for further analysis and integration with other data sources. It is possible  
206 to appreciate how pseudogenes are associated with a negligible relative fraction of variants and publications  
207 (0.003% and 0.005%, respectively), although they account for 1/3 of Ensembl Genes entries. Figure 3 (b) shows  
208 the analysis of the fifty most extensively studied and represented genes within the GRPM dataset. Among  
209 them, TP53 and MTHFR concentrate the highest number of PMIDs, with and without MeSHs. This deviation  
210 is expected since both encode proteins extremely relevant to human metabolism and health — TP53  
211 (ENSG00000141510) encodes the Cellular tumor antigen p53 (P53\_HUMAN), a tumor suppressor that  
212 monitors DNA integrity and initiates cellular responses to prevent tumor formation; MTHFR  
213 (ENSG00000177000) encodes the methylenetetrahydrofolate reductase (MTHR\_HUMAN), that takes part in  
214 homocysteine metabolism and is essential for methylation reactions.

---

<sup>8</sup> NLTK - Natural Language Toolkit: <https://www.nltk.org/>

<sup>9</sup> Available on Zenodo at <https://zenodo.org/record/8205724> DOI: 10.5281/zenodo.8205724

215 A conspicuous portion of LitVar PMIDs (~77%) PMIDs extracted from LitVar is associated with MeSH terms,  
 216 ensuring consistency and reliability for further investigations.

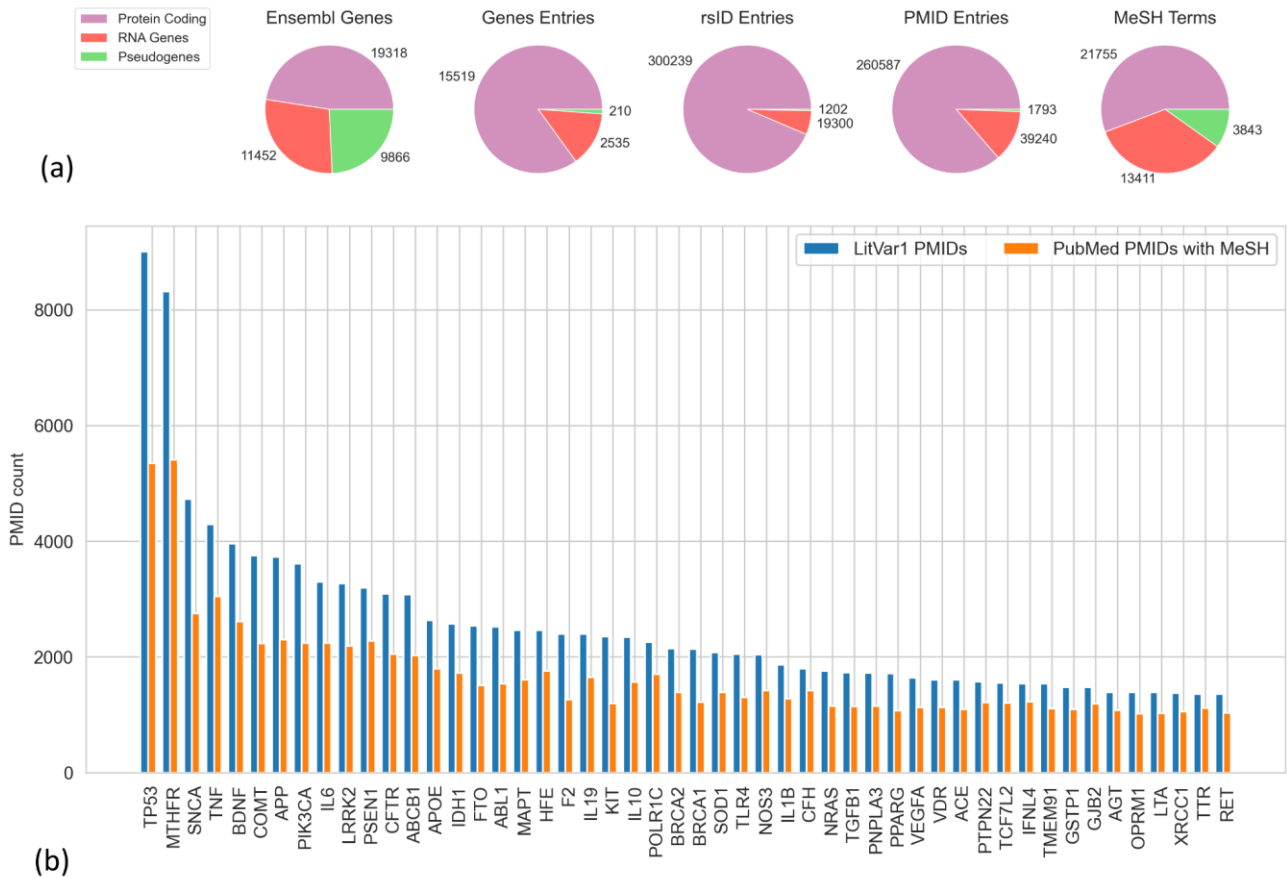

217 **Figure 3** Statistics concerning the primary GRPM dataset. In (a), the diagram showcases the distribution of genes, rsID,  
 218 PMID, and MeSH terms across the three dataset partitions. (b) depicts the top fifty most represented genes in the  
 219 dataset, along with their occurrence in PMID counts and PMID associated with MeSH terms.  
 220

### 221 3.2 Nutrigenetic Dataset

222 Our study aimed to create a nutrigenetic dataset using a collection of MeSH terms related to different aspects  
 223 of nutrition. We utilized specific MeSH terms that covered nutrition physiology, nutrition-related diseases,  
 224 disease prevention through diet, and eating behavior. This approach allowed us to process LitVar-PubMed  
 225 data in a way relevant to personalized nutritional approaches. In Table 1, we describe each selected field of  
 226 interest in the context of a personalized nutritional approach.

227 **Table 1:** Categories of nutrition-related MeSH terms used to build the nutrigenetic database.

| Category                                                              | Description                                                                                                                                                                                                               | MeSH count |
|-----------------------------------------------------------------------|---------------------------------------------------------------------------------------------------------------------------------------------------------------------------------------------------------------------------|------------|
| General Nutrition                                                     | A broad range of topics related to nutrition, including dietary patterns, nutrient requirements, nutritional status, and the impact of nutrition on overall health and well-being.                                        | 413        |
| Obesity, Weight Control, and Compulsive Eating                        | Terms related to weight management, including obesity, weight loss strategies, and disorders such as binge eating or compulsive overeating.                                                                               | 243        |
| Cardiovascular Health and Lipid Metabolism                            | Terms related to nutrition and cardiovascular health, including the impact of dietary factors on lipid metabolism, cholesterol levels, and the prevention of cardiovascular diseases.                                     | 319        |
| Diabetes Mellitus Type II and Metabolic Syndrome                      | Terms related to type II diabetes and metabolic syndrome. Including dietary interventions, glucose metabolism, insulin resistance, and related complications.                                                             | 528        |
| Vitamin and Micronutrients Metabolism and Deficiency-Related Diseases | Terms related to the metabolism of essential vitamins and micronutrients, the impact of deficiencies on health, and the development of associated diseases.                                                               | 175        |
| Eating Behavior and Taste Sensation                                   | Terms related to individual eating behaviors, including factors influencing food choices, taste preferences, satiety, and appetite regulation.                                                                            | 292        |
| Food Intolerances                                                     | Terms related to adverse reactions to specific foods, such as lactose intolerance or gluten sensitivity. Explores the genetic and physiological factors underlying food intolerances and their impact on dietary choices. | 145        |
| Food Allergies                                                        | Examines the genetic basis of food allergies, identification of allergenic components, and strategies for managing allergic reactions through diet.                                                                       | 65         |
| Diet-induced Oxidative Stress                                         | Explores the relationship between dietary factors and oxidative stress and investigates the impact of diet on oxidative stress levels and its health implications.                                                        | 77         |
| Xenobiotics Metabolism                                                | Focuses on the metabolism of foreign substances (xenobiotics) in the body, including drugs, environmental toxins, and dietary components.                                                                                 | 170        |

228

229 Figure S2 presents an overview of the most interesting genes with their relative MeSH and PMID values on  
 230 the ten nutrient lists used in our study. This figure offers a representative example of the analysis conducted  
 231 and allows for a quick comparison of gene relevance across different nutrient-related traits. The Figure allows

232 for a quick comparison of gene relevance across different nutrient-related traits, showing the relative  
233 richness of the associated MeSH terms and the papers associated with each gene.

234 Table 2 provides statistical data on the ten nutritional MeSH term lists employed. The table left section  
235 provides information on data retrieved with every nutritional MeSH term list scanning the GRPM dataset. In  
236 a large dataset like this, there can be a wide range of genes and associated MeSH terms, making it challenging  
237 to identify the genes of highest interest and relevance to the specific research focus. For this reason, the right  
238 section presents the same data filtered Gene Interest (GI) < 0.0125, representing the most significant  
239 matches available for further investigation and nutrigenetic applications. Applying a GI cut-off was necessary  
240 to select the most relevant and meaningful search results.

241 **Table 2:** Statistical data associated with the ten nutritional MeSH lists applied to the build dataset.

| label                    | All MeSH matching in DB |         |        |       | Interesting entries based on GI threshold (0.0125) |        |        |       |
|--------------------------|-------------------------|---------|--------|-------|----------------------------------------------------|--------|--------|-------|
|                          | #gene                   | #rsID   | #PMID  | #MeSH | #gene                                              | #rsID  | #PMID  | #MeSH |
| General Nutrition        | 11,560                  | 83,288  | 62,473 | 413   | 686                                                | 26,456 | 44,859 | 397   |
| Obesity & Weight Control | 9,713                   | 53,879  | 35,563 | 243   | 317                                                | 10,842 | 22,123 | 230   |
| Diabetes Type II & MS    | 10,717                  | 68,844  | 49,896 | 319   | 603                                                | 22,270 | 36,198 | 297   |
| Cardiovascular Health    | 12,368                  | 105,598 | 85,065 | 528   | 975                                                | 41,931 | 66,113 | 521   |
| Vitamins & Minerals      | 4,045                   | 16,857  | 11,941 | 175   | 89                                                 | 3,525  | 6,882  | 147   |
| Eating Behavior          | 5,525                   | 20,607  | 13,734 | 292   | 211                                                | 4,252  | 7,241  | 256   |
| Food Intolerances        | 4,040                   | 14,117  | 7,416  | 145   | 392                                                | 5,008  | 4,726  | 125   |
| Food Allergies           | 4,681                   | 16,777  | 11,032 | 65    | 451                                                | 6,289  | 7,762  | 64    |
| Oxidative Stress         | 5,156                   | 20,919  | 19,295 | 77    | 75                                                 | 2,559  | 10,058 | 60    |
| Xenobiotics Metab        | 7,115                   | 35,686  | 27,237 | 170   | 173                                                | 7,159  | 14,171 | 151   |

242

243

244

245 We constructed co-occurrence matrices to explore the extent of overlap within the data obtained from the  
246 ten nutritional MeSH lists. Figure 4 shows the co-occurrence patterns between genes, rsID, PMID, and MeSH  
247 terms among filtered results by  $GI > 0.0125$ . The heatmaps<sup>10</sup> in Figure 4 show interesting overlap patterns  
248 among the different MeSH lists. For example, the results obtained from the "obesity" lists show a high overlap  
249 with the "diabetes" and "cardiovascular health" lists, sharing approximately 80% of the items. The latter  
250 shows a 40-60% overlap in this first group of three.

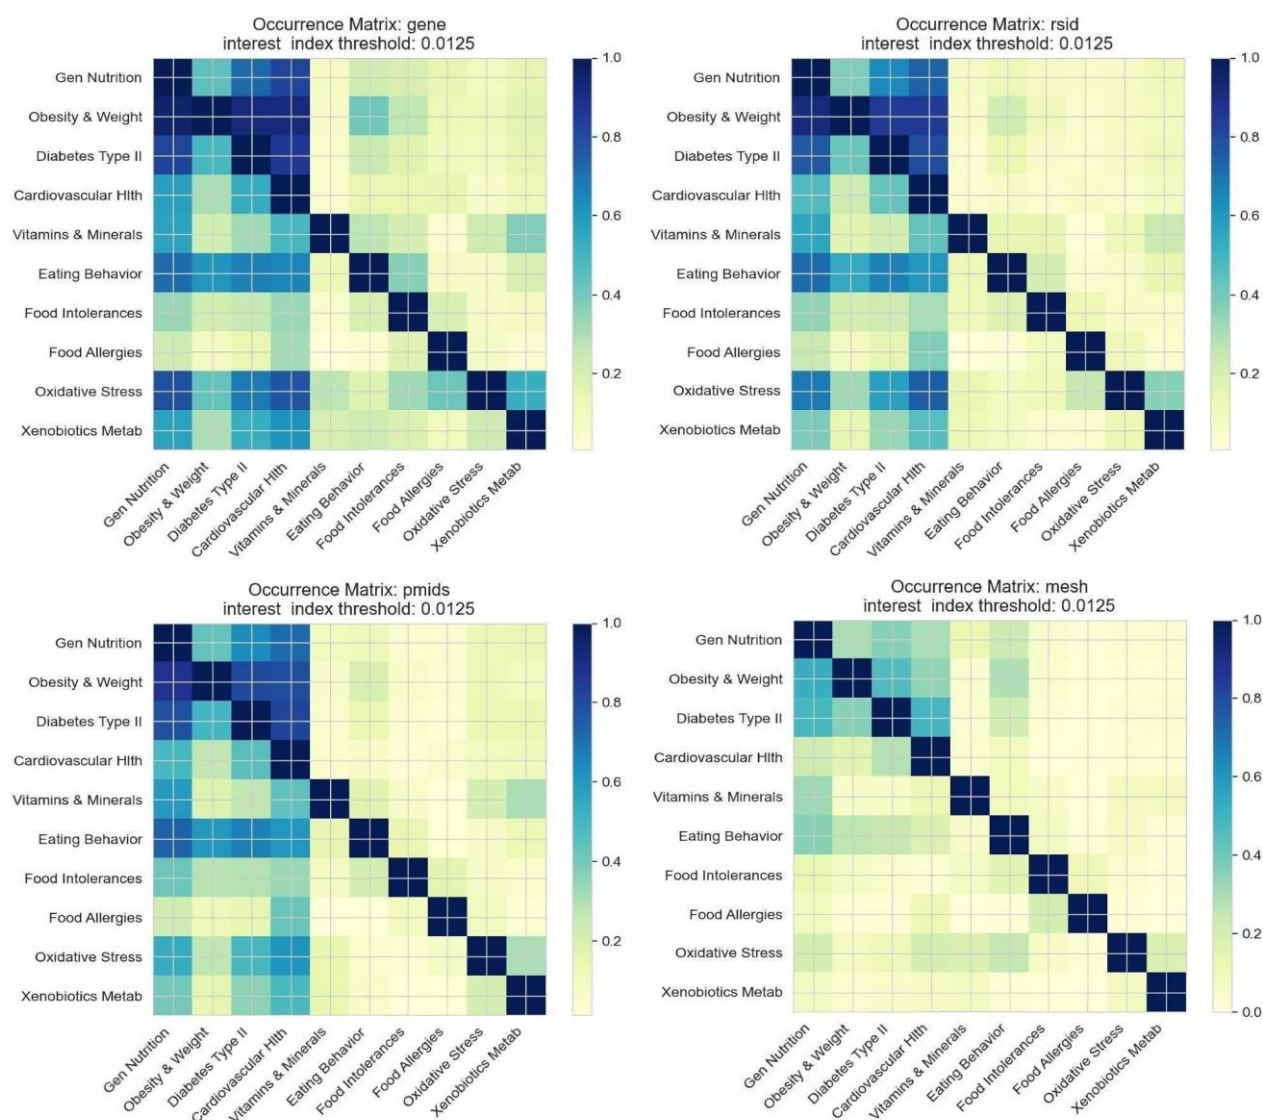

251 Figure 4: Co-occurrence patterns among genes, rsID, PMID, and MeSH terms observed in the filtered results  
252 ( $GI > 0.0125$ ) from the ten nutritional MeSH lists used for screening. The color key represents the amount of  
253 overlap between datasets scaled over the total size of each dataset.

<sup>10</sup> In the heatmap, we calculated row-wise (i.e., dataset) relative values as the ratio between number of shared entities and total number of entities of the row. This approach allows for a focused examination of co-occurrence within specific categories, providing a granular understanding of the relationships and interactions at the row level.

### 254 **3.3 Method Validation**

255 Figure 5 (a) shows the fifty most interesting genes in the "Vitamin and Micronutrient Metabolism" list  
256 compared to the values of interest on results obtained from 5 other nutritional MeSH term lists. The genes  
257 extracted using the GRPM system show specificity for the list of MeSH terms used as a reference model. This  
258 behavior suggests the GRPM system can identify genes related to that particular nutritional aspect. However,  
259 some of them are more interesting in other MeSH term lists than the one taken as a reference, meaning they  
260 are more closely associated with other nutritional features or specific biological processes. This observation  
261 suggests the complexity of gene regulation in nutrient metabolism and underscores the importance of  
262 considering a broader range of nutritional MeSH terms to gain a comprehensive understanding of the  
263 biological system under consideration. Supplementary Materials provide additional GI comparison results,  
264 showcasing the comparison among another MeSH list utilized in our study (Figure S3).

265 To ensure the accuracy and reliability of the data collected, we compared the results obtained with  
266 biologically consistent MeSH lists with those obtained with twenty random MeSH lists<sup>11</sup> of the same size.  
267 Figure 5 (b) provides an example of the comparison results on the "General Nutrition" list. Another reference  
268 is shown in Supplementary Materials (S4).

---

<sup>11</sup> Containing 450 random terms each, based on 21,705 LitVar MeSH in the GRPM dataset.

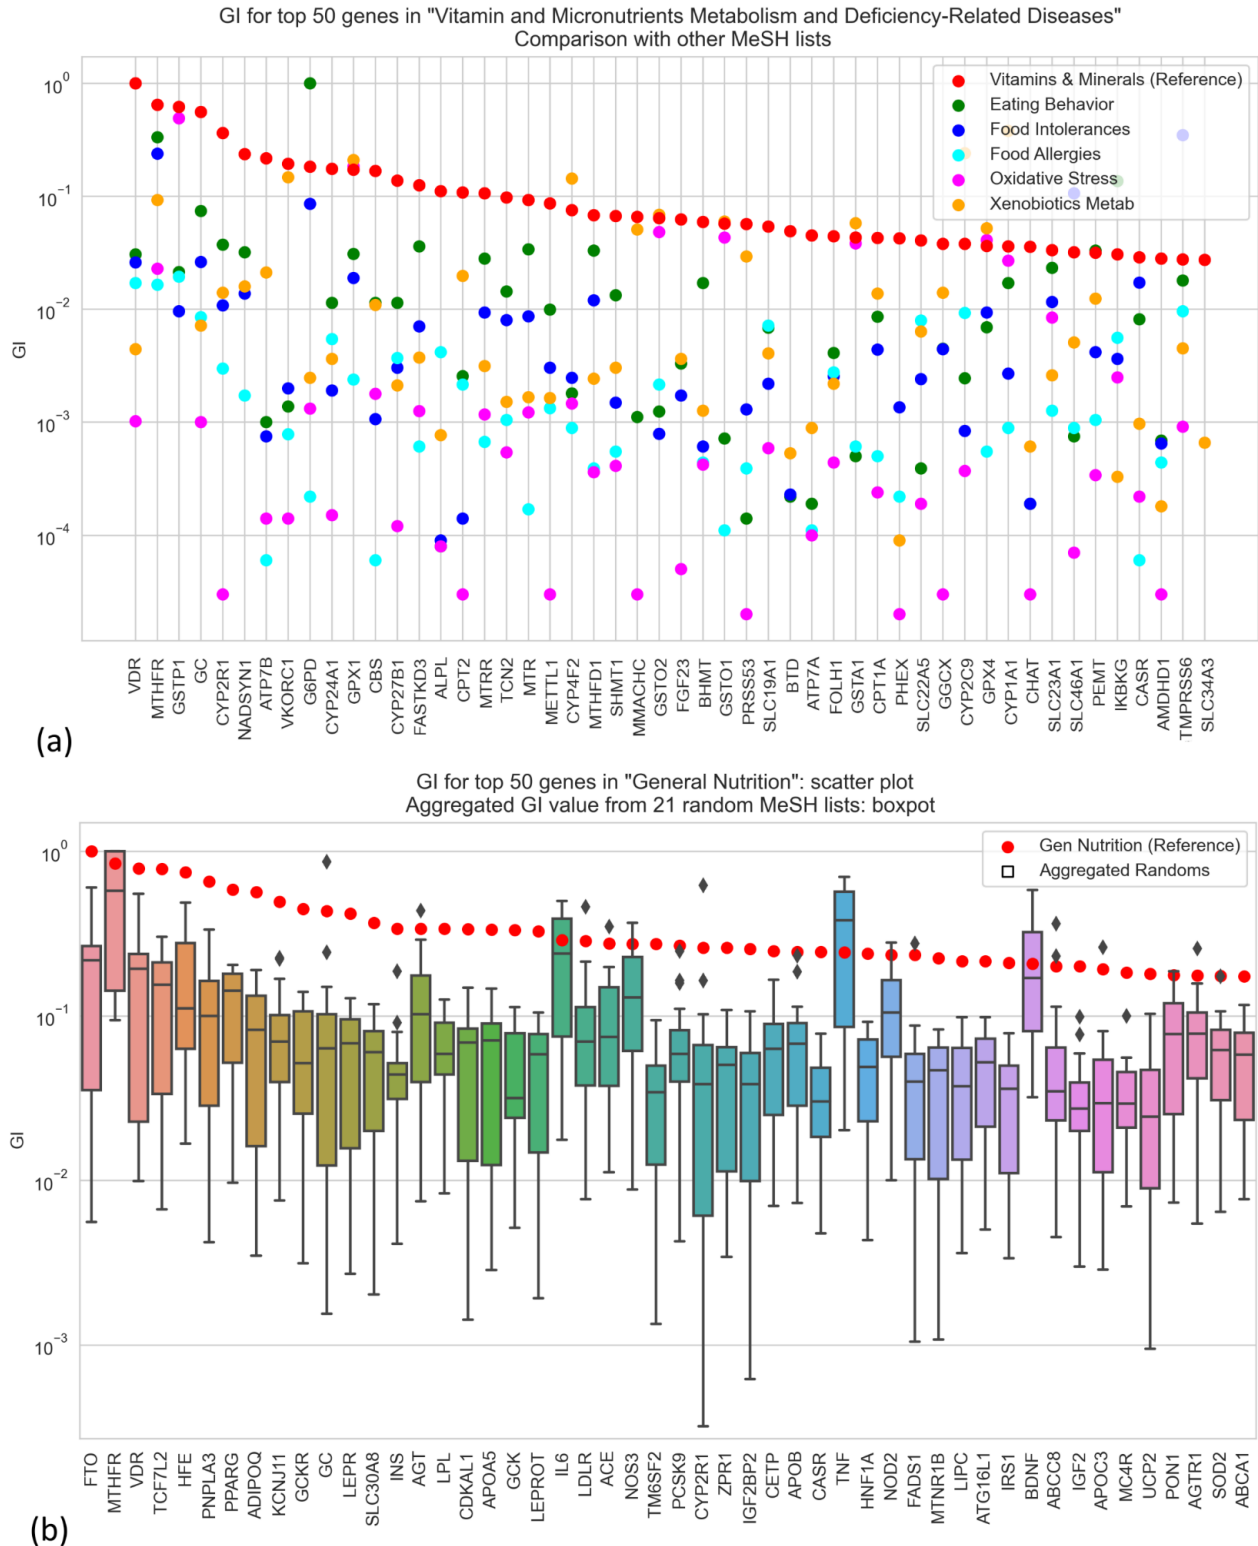

269 **Figure 5:** (a) Comparison of Gene Interest Index (GI) for the top fifty genes on the "Vitamin and Micronutrient  
270 Metabolism" MeSH list with GI obtained from five different lists of nutrition MeSH terms. (b) Comparison between GI  
271 obtained from the "General Nutrition" list and GI obtained using twenty randomly generated MeSH lists of the same  
272 size represented as boxplots. In both graphs the y-axis is logarithmic; genes are ordered by decreasing interest relative  
273 to the reference list.

### 274 3.4 GWAS data integration

275 Cross-referencing data between the GRPM dataset and the GWAS catalog dataset provides indicative  
276 information about possible risk alleles associated with the collected studies. **Table 3** shows a sample of this  
277 integration on the GRPM "General Nutrition" dataset, along with the corresponding GWAS catalog  
278 information, such as Mapped Trait and Strongest Risk Allele. The preliminary results obtained through NLTK  
279 show congruence between the MeSH associated with the PMID and the mapped GWAS trait.

280 The merging process on the "General Nutrition" dataset, with a GI cut-off of 0.0125, resulted in the following  
281 statistics: The number of genes from the LitVar database was 365, while the number of genes with mapping  
282 information was 359. There were 186 MeSH terms, 467 mapped traits, 1155 disease/traits, and 1678  
283 identified strongest SNP-risk alleles.

284 **Table 3:** Sample of fifteen GRPM associations from the "General Nutrition" list merged on rsID with the GWAS Catalog  
285 dataset.

| GRPM Data   |            |             | GWAS Data                 |                                                  |                                        |                           |
|-------------|------------|-------------|---------------------------|--------------------------------------------------|----------------------------------------|---------------------------|
| LITVAR GENE | LIVAR RSID | LITVAR PMID | PUBMED MeSH               | MAPPED TRAIT                                     | DISEASE/TRAIT                          | STRONGEST SNP-RISK ALLELE |
| SEM1        | rs7781370  | 22698912    | Body Mass Index           | body height                                      | Height                                 | rs7781370-T               |
| MTHFR       | rs9651118  | 33213085    | Hypertension              | red blood cell distribution width                | Red cell distribution width            | rs9651118-T               |
| CADM2       | rs13078807 | 25893265    | Pediatric Obesity         | obesity                                          | Obesity                                | rs13078807-G              |
| C1QTNF6     | rs229533   | 25751624    | Diabetes Mellitus, Type 1 | type 2 diabetes mellitus                         | Type 1 diabetes                        | rs229533-C                |
| GHR         | rs6184     | 34074802    | Body Mass Index           | body height                                      | Height                                 | rs6184-A                  |
| TMEM258     | rs102275   | 31636271    | Lipoproteins, LDL         | high density lipoprotein cholesterol measurement | Fasting total cholesterol in large HDL | rs102275-C                |
| SHROOM3     | rs56281442 | 34502231    | Diabetes Mellitus, Type 2 | type 2 diabetes mellitus                         | Type 2 diabetes                        | rs56281442-G              |



|          |            |          |                           |                          |                           |              |
|----------|------------|----------|---------------------------|--------------------------|---------------------------|--------------|
| LDLR     | rs6511720  | 27973560 | Coronary Artery Disease   | coronary artery disease  | Coronary artery disease   | rs6511720-T  |
| TP53INP1 | rs10097617 | 30054458 | Diabetes Mellitus, Type 2 | type 2 diabetes mellitus | Type 2 diabetes           | rs10097617-T |
| PROX1    | rs2075423  | 32390949 | Diabetes, Gestational     | type 2 diabetes mellitus | Type 2 diabetes           | rs2075423-G  |
| HFE      | rs1799945  | 11473047 | Blood Glucose             | systolic blood pressure  | Systolic blood pressure   | rs1799945-G  |
| ESR1     | rs6902771  | 31213659 | Body Mass Index           | body weight              | Weight                    | rs6902771-T  |
| LEP      | rs17151919 | 33631239 | Leptin                    | leptin measurement       | circulating leptin levels | rs17151919-A |
| CYP2R1   | rs7129781  | 23456391 | Vitamin D3 24-Hydroxylase | vitamin D measurement    | Vitamin D levels          | rs7129781-C  |
| CYP2C19  | rs4494250  | 27618448 | Hypertension              | diastolic blood pressure | Diastolic blood pressure  | rs4494250-A  |

286

## 287 4. Discussion

288 Understanding how genetic variations influence individual nutritional requirements, metabolism, and health  
289 outcomes is crucial for developing personalized nutrition interventions (15). By considering an individual's  
290 genetic profile, healthcare operators and nutritionists can provide tailored dietary advice, optimizing nutrient  
291 bioavailability, and promoting better health outcomes, thus preventing chronic diseases such as obesity (16),  
292 diabetes (17), or cardiovascular diseases (18).

293 Personalized approaches in healthcare and prevention are at the forefront of translational bioinformatics  
294 (19). The development of computational methods and tools for consolidating and analyzing information from  
295 multiple sources enhances data integration, enabling the translation of findings into personalized nutrition  
296 interventions and disease prevention strategies (20,21).

297 The GRPM resource is an integrated platform for diverse data sources related to genetic polymorphisms  
298 associated with nutrition. This resource enables efficient retrieval, merging, and analysis, facilitating  
299 comprehensive research in nutrigenomics. Our approach leverages data mining and merging techniques to

300 identify relevant studies on nutrition-associated genetic polymorphisms based on specific MeSH term sets.  
301 The pipeline allowed us to extract subsets of genes and associated SNPs linked to nutrition-related traits.  
302 Machine learning algorithms could further enhance the analysis of these data to uncover intricate gene-diet  
303 interactions by enabling the discovery of patterns and correlations and by producing predictive models (22).  
304 Indeed, although focused primarily on genetic polymorphism and associated literature, integrating our study  
305 with multi-omics data could provide further insight into the interplay between genetics and nutrition, thus  
306 providing a more holistic understanding of such a complex biological field (22).

307 It is essential to highlight that this method's potential applications extend beyond the scope of our study.  
308 Our approach can be employed to gather specific genetic polymorphisms associated with various health or  
309 biological dysfunctions, empowering healthcare practitioners to tailor interventions based on an individual's  
310 genetic profile (23).

311 As remarked by Floris and co-workers, the current approach adopted by many companies in nutrigenetic  
312 counseling still relies on a limited set of genes and polymorphisms for genetic testing and counseling (24).  
313 However, as sequencing costs continue to decrease and sequencing technologies become more accessible  
314 than before, it is no longer justifiable to base nutrigenetic panels on a small number of genetic markers (24).  
315 Using a limited set of genes and polymorphisms may overlook significant genetic variations that affect an  
316 individual's response to nutrients and dietary patterns. Our study addresses the limitations of current  
317 approaches in nutrigenetics by consolidating and standardizing information on genetic polymorphisms  
318 associated with nutrition. Our nutrigenetic dataset offers a broader scope and coverage, improving the global  
319 understanding of the interplay between genetics and nutrition-related traits.

320 Within GRPM ds, MeSH term richness across nutrigenetic categories is quite heterogeneous, confirming that  
321 some categories may have a broader range of MeSH terms, covering various aspects of nutrition, while others  
322 may have a narrower focus, addressing specific subtopics within nutrition.

323 Regarding our nutrigenetic dataset, particularly concerning the genes found on the MeSH lists described in  
324 Table 2, it is worth mentioning that the most interesting genes identified in our study are well-known in the  
325 field of nutrigenetics. These genes have been extensively studied and represented in literature. The fact that  
326 these genes consistently appear in multiple MeSH lists further supports their relevance concerning nutrition-  
327 related traits.

328 From a broader standpoint, the analysis revealed a high degree of overlap between genes associated with  
329 specific nutritional aspects (Figure 4). For example, the "obesity" lists exhibit high overlap with the "diabetes"  
330 and "cardiovascular health" lists, indicating shared genetic polymorphisms and pathways. This finding is not  
331 surprising given the close relationship between obesity, diabetes, and cardiovascular health, as these

332 conditions often coexist and share common genetic and physiological factors. The high overlap suggests that  
333 shared genetic polymorphisms and pathways may be involved in these conditions.

334 Conversely, the lower degree of overlap between specific lists could be attributed to the specificity of these  
335 lists, focusing on more specific biological processes or conditions with distinct genetic underpinnings. This  
336 behavior can be attributed to several factors. Firstly, these lists may be described by fewer MeSH terms,  
337 leading to a narrower focus and less overlap with other lists. Secondly, these lists may pertain to more specific  
338 biological processes or conditions with distinct genetic underpinnings than the broader conditions captured  
339 by the other lists.

340 The results obtained from cross-referencing the GRPM dataset with the GWAS catalog dataset further  
341 validated the findings, providing information about potential risk alleles associated with the identified genetic  
342 polymorphisms. The preliminary results obtained through NLTK show congruence between the MeSH  
343 associated with the PMID and the mapped GWAS trait (Table 3).

344 We thoroughly validated our method to ensure the validity and reliability of our results. Firstly, we compared  
345 the most interesting genes associated with each MeSH list to the results obtained from other nutritional  
346 MeSH term lists (Figure 5, A). This validation step demonstrated the effectiveness of the GRPM system in  
347 identifying genes specifically related to the chosen nutritional aspect. However, we also observed that  
348 specific genes showed higher interest in other MeSH term lists, highlighting the complexity of gene regulation  
349 in nutrient metabolism and the need to consider multiple aspects of nutrition.

350 Furthermore, to ensure our data's accuracy and reliability, we compared the results obtained with  
351 biologically consistent MeSH term lists and randomly aggregated MeSH terms (Figure 5, B). This comparison  
352 was crucial in assessing the significance of our findings. Our results demonstrated that using biologically  
353 consistent MeSH lists led to meaningful results. The genes and variants identified using these lists were  
354 relevant to the specific nutritional context studied. On the other hand, when we adopted randomly  
355 aggregated MeSH terms lacking biological cohesion, the results were non-significant and lacked meaningful  
356 associations. This comparison highlights the importance of utilizing biologically relevant MeSH lists to retrieve  
357 and prioritize genuinely relevant to the chosen biomedical context.

358 However, it is essential to acknowledge the limitations of this approach. One limitation of our approach is  
359 the reliance on available literature and databases. The accuracy and reliability of the build resource depend  
360 on the quality and completeness of the data retrieved from various sources, as well as the accuracy of the  
361 data structuring and integration process. Our method relies on data from Medline studies, which may be  
362 subject to publication bias (25). The data quality and consistency of retrieved data heavily depend on the  
363 quality of the original studies and the curation process. Despite efforts to ensure data quality, the original  
364 studies' inconsistencies, errors, and biases may still be present in the constructed dataset.

365 Moreover, our dataset is limited to the data available in the LitVar database, GWAS-Catalog, and other  
366 sources used in our study (26). As a result, it may not encompass all potential genetic polymorphisms  
367 associated with nutrition-related traits. Relying on available literature and data collection databases has  
368 limitations (27). Despite our efforts to minimize MeSH attribution bias, the dataset could not contain all the  
369 relevant literature. Inconsistencies, errors, and biases in the original studies may be transferred to the  
370 constructed dataset. Finally, the dataset may cover only some populations and ethnicities, which could limit  
371 its applicability to diverse populations with different genetic backgrounds (28).

372 Furthermore, it is essential to acknowledge gene-environment interactions' complex and multifactorial  
373 nature, including interactions with dietary factors (29). While our dataset captures a subset of the possible  
374 interactions, it may not encompass their full complexity. In interpreting the associations between genetic  
375 polymorphisms and nutrition-related traits, it is crucial to consider other factors, such as environmental  
376 influences, epigenetic modifications, and gene-gene interactions (30). Therefore, the complexity of gene-  
377 environment interactions, including interactions with dietary factors, requires further investigation beyond  
378 the scope of this research.

379 Finally, to improve the validity of the study's results, it is essential to assess the quality and scientific validity  
380 of the literature sources through established criteria. Future research could follow the scientific validity  
381 assessment criteria described by Grimaldi and co-workers (31) to ensure the reliability of individual sources.

382

## 383 **5. Conclusion**

384 Our study presents a comprehensive approach for building a nutrigenetic dataset by integrating data from  
385 multiple sources through the MeSH ontology. In conclusion, the study presents a methodological framework  
386 and a valuable resource for exploring genetic polymorphisms associated with nutrition-related traits. The  
387 integration and analysis of genetic polymorphism data in the field of nutrition holds great promise for  
388 advancing personalized nutrition interventions. This study highlights the importance of utilizing standardized  
389 curation processes and comprehensive datasets in nutrigenomics research. The curated dataset presented  
390 here fills a gap in the existing literature by providing a consolidated and standardized resource for  
391 investigating genetic polymorphisms associated with nutrition-related traits.

392 This study exemplifies the importance of translational bioinformatics in nutrition and nutrigenomics,  
393 underscoring the significance of computational approaches in consolidating and analyzing information from  
394 multiple sources, thereby facilitating comprehensive research in the field of nutrigenomics.

## 395 Bibliography

- 396 1. Chen Y, Michalak M, Agellon LB. Importance of Nutrients and Nutrient Metabolism on Human Health.  
397 Yale J Biol Med. 2018 Jun 28;91(2):95–103.
- 398 2. KIANI AK, BONETTI G, DONATO K, KAFTALLI J, HERBST KL, STUPPIA L, et al. Polymorphisms, diet and  
399 nutrigenomics. J Prev Med Hyg. 2022 Oct 17;63(2 Suppl 3):E125–41.
- 400 3. Loktionov A. Common gene polymorphisms and nutrition: emerging links with pathogenesis of  
401 multifactorial chronic diseases (review). J Nutr Biochem. 2003 Aug;14(8):426–51.
- 402 4. Mathers JC. Nutrigenomics in the modern era. Proc Nutr Soc. 2017 Aug;76(3):265–75.
- 403 5. Kaput J. Nutrigenomics research for personalized nutrition and medicine. Curr Opin Biotechnol. 2008  
404 Apr;19(2):110–20.
- 405 6. Fenech M, El-Sohemy A, Cahill L, Ferguson LR, French TAC, Tai ES, et al. Nutrigenetics and  
406 nutrigenomics: viewpoints on the current status and applications in nutrition research and practice. J  
407 Nutr Nutr. 2011;4(2):69–89.
- 408 7. Comerford KB, Pasin G. Gene–Dairy Food Interactions and Health Outcomes: A Review of Nutrigenetic  
409 Studies. Nutrients. 2017 Jul 6;9(7):710.
- 410 8. Singh V. Current challenges and future implications of exploiting the omics data into nutrigenetics and  
411 nutrigenomics for personalized diagnosis and nutrition-based care. Nutrition. 2023 Jun 1;110:112002.
- 412 9. Allot A, Peng Y, Wei CH, Lee K, Phan L, Lu Z. LitVar: a semantic search engine for linking genomic variant  
413 data in PubMed and PMC. Nucleic Acids Res. 2018 Jul 2;46(Web Server issue):W530–6.
- 414 10. MacArthur J, Bowler E, Cerezo M, Gil L, Hall P, Hastings E, et al. The new NHGRI-EBI Catalog of  
415 published genome-wide association studies (GWAS Catalog). Nucleic Acids Res. 2017 Jan 4;45(Database  
416 issue):D896–901.
- 417 11. Use of MeSH in Cataloging [Internet]. [cited 2023 Aug 3]. Available from: [https://wayback.archive-  
418 it.org/org-350/20200228165129/https://www.nlm.nih.gov/tsd/cataloging/MeSH\\_CatPractices.html](https://wayback.archive-it.org/org-350/20200228165129/https://www.nlm.nih.gov/tsd/cataloging/MeSH_CatPractices.html)
- 419 12. Leydesdorff L, Comins JA, Sorensen AA, Bornmann L, Hellsten I. Cited references and Medical Subject  
420 Headings (MeSH) as two different knowledge representations: clustering and mappings at the paper  
421 level. Scientometrics. 2016;109(3):2077–91.
- 422 13. Khare R, Leaman R, Lu Z. Accessing Biomedical Literature in the Current Information Landscape.  
423 Methods Mol Biol Clifton NJ. 2014;1159:11–31.
- 424 14. Pimentel JF, Murta L, Braganholo V, Freire J. Understanding and improving the quality and  
425 reproducibility of Jupyter notebooks. Empir Softw Eng. 2021;26(4):65.
- 426 15. Reddy VS, Palika R, Ismail A, Pullakhandam R, Reddy GB. Nutrigenomics: Opportunities & challenges for  
427 public health nutrition. Indian J Med Res. 2018 Nov;148(5):632–41.
- 428 16. O'Rahilly S, Farooqi IS. Human obesity as a heritable disorder of the central control of energy balance.  
429 Int J Obes 2005. 2008 Dec;32 Suppl 7:S55–61.
- 430 17. Wang DD, Hu FB. Precision nutrition for prevention and management of type 2 diabetes. Lancet  
431 Diabetes Endocrinol. 2018 May;6(5):416–26.

- 432 18. Peña-Romero AC, Navas-Carrillo D, Marín F, Orenes-Piñero E. The future of nutrition: Nutrigenomics  
433 and nutrigenetics in obesity and cardiovascular diseases. *Crit Rev Food Sci Nutr*. 2018 Nov  
434 22;58(17):3030–41.
- 435 19. Di Camillo B, Giugno R. From translational bioinformatics computational methodologies to personalized  
436 medicine. *J Biomed Inform*. 2022 Sep 1;133:104170.
- 437 20. Lee KH, Kim JH. Evolution of Translational Bioinformatics: lessons learned from TBC 2016. *BMC Med*  
438 *Genomics*. 2017 May 24;10(Suppl 1):32.
- 439 21. Tenenbaum JD. Translational Bioinformatics: Past, Present, and Future. *Genomics Proteomics*  
440 *Bioinformatics*. 2016 Feb;14(1):31–41.
- 441 22. Zhang Y, Zhu Q, Liu H. Next generation informatics for big data in precision medicine era. *BioData Min*.  
442 2015;8:34.
- 443 23. Carrasco-Ramiro F, Peiró-Pastor R, Aguado B. Human genomics projects and precision medicine. *Gene*  
444 *Ther*. 2017 Sep;24(9):551–61.
- 445 24. Floris M, Cano A, Porru L, Addis R, Cambedda A, Idda ML, et al. Direct-to-Consumer Nutrigenetics  
446 Testing: An Overview. *Nutrients*. 2020 Feb 21;12(2):566.
- 447 25. Carter AO, Griffin GH, Carter TP. A survey identified publication bias in the secondary literature. *J Clin*  
448 *Epidemiol*. 2006 Mar;59(3):241–5.
- 449 26. Lachance J, Tishkoff SA. SNP ascertainment bias in population genetic analyses: why it is important, and  
450 how to correct it. *BioEssays News Rev Mol Cell Dev Biol*. 2013 Sep;35(9):780–6.
- 451 27. Williams WG. Uses and limitations of registry and academic databases. *Semin Thorac Cardiovasc Surg*  
452 *Pediatr Card Surg Annu*. 2010;13(1):66–70.
- 453 28. Nilsson PD, Newsome JM, Santos HM, Schiller MR. Prioritization of Variants for Investigation of  
454 Genotype-Directed Nutrition in Human Superpopulations. *Int J Mol Sci*. 2019 Jul 18;20(14):3516.
- 455 29. Virolainen SJ, VonHandorf A, Viel KCMF, Weirauch MT, Kottyan LC. Gene-environment interactions and  
456 their impact on human health. *Genes Immun*. 2023 Feb;24(1):1–11.
- 457 30. Cole BS, Hall MA, Urbanowicz RJ, Gilbert-Diamond D, Moore JH. Analysis of Gene-Gene Interactions.  
458 *Curr Protoc Hum Genet*. 2017 Oct 18;95:1.14.1-1.14.10.
- 459 31. Grimaldi KA, van Ommen B, Ordovas JM, Parnell LD, Mathers JC, Bendik I, et al. Proposed guidelines to  
460 evaluate scientific validity and evidence for genotype-based dietary advice. *Genes Nutr*. 2017;12:35.

## 461 **Declaration of Generative AI and AI-assisted technologies in the** 462 **writing process**

463 During the preparation of this work, the author(s) used the Generative Pre-trained Transformer (GPT)  
464 provided by OpenAI API to facilitate the subsetting of the extensive MeSH collection with representatives of  
465 a particular biomedical field. After using this service, the authors reviewed and edited the content as needed  
466 and take full responsibility for the publication's content.

467

## 468 **Author contributions**

469 **GMDF:** Writing - original draft, Conceptualization, Data curation, Software, Visualization, Writing – review &  
470 editing; **MM:** Writing - original draft, supervision, Investigation, Writing – review & editing; **AP:** Supervision,  
471 Writing – review & editing, Validation; **TA:** Supervision, Writing – review & editing, Validation; **BHM:** Writing  
472 - original draft, Conceptualization, Formal analysis, Validation, Writing – review & editing; **VC:** Funding  
473 acquisition, Conceptualization, Supervision, Writing – review & editing.

## 474 **Declaration of Competing Interest**

475 The authors declare that they have no known competing financial interests or personal relationships that  
476 could have appeared to influence the work reported in this paper.

## 477 **Acknowledgment**

478 Our research was supported by Federazione Nazionale Degli Ordini dei Biologi.
